# Supplementary material for: Nitrogen-doped graphene-activated metallic nanoparticle-incorporated ordered mesoporous carbon nanocomposites for the hydrogenation of nitroarenes
Source: Royal Society of Chemistry journal article supplement (doi:10.1039/c8ra00761f), 2018-01-01
Supplement: c8ra00761f1.pdf [file c8ra00761f1.pdf]

# Nitrogen-doped graphene-activated metallic nanoparticles-incorporated ordered mesoporous carbon nanocomposites for hydrogenation of nitroarenes

Haigen Huang, Xueguang Wang, Yao Sheng, Chenju Chen, Xiuqing Zou, Xingfu Shang, and Xionggang Lu

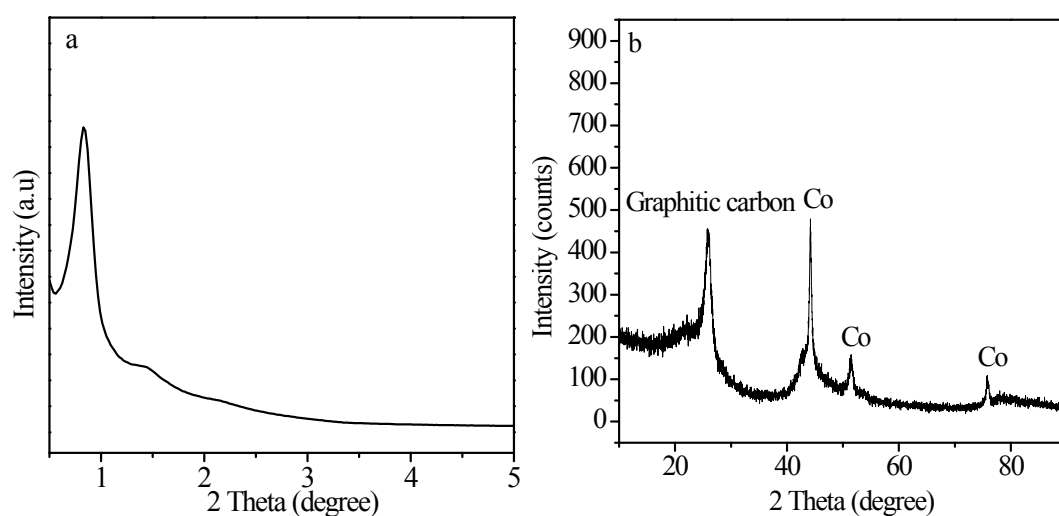

**Fig. S1** (a) Low-angle XRD patterns, and (b) Wide-angle XRD pattern of the Co/NGr@OMC-800 catalyst.

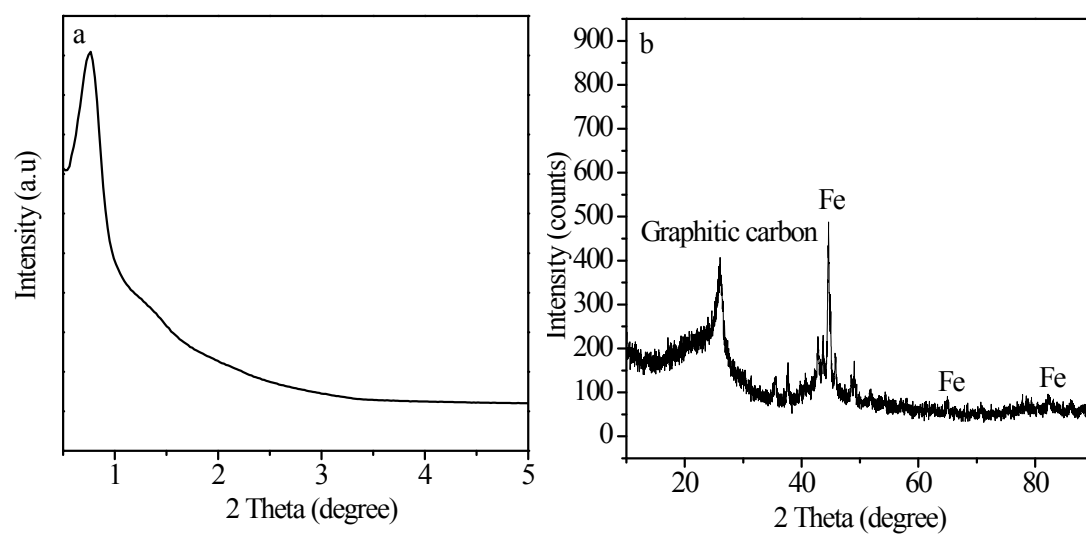

**Fig. S2** (a) Low-angle XRD patterns, and (b) Wide-angle XRD pattern of the Fe/NGr@OMC-800 catalyst.

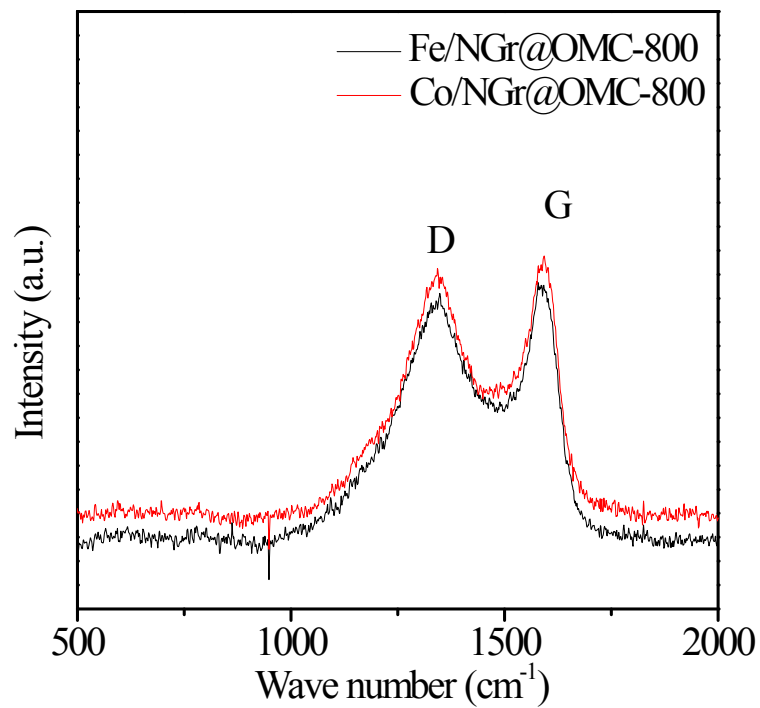

**Fig. S3** Raman spectrum of the Co/NGr@OMC-800 and Fe/NGr@OMC-800 catalysts.

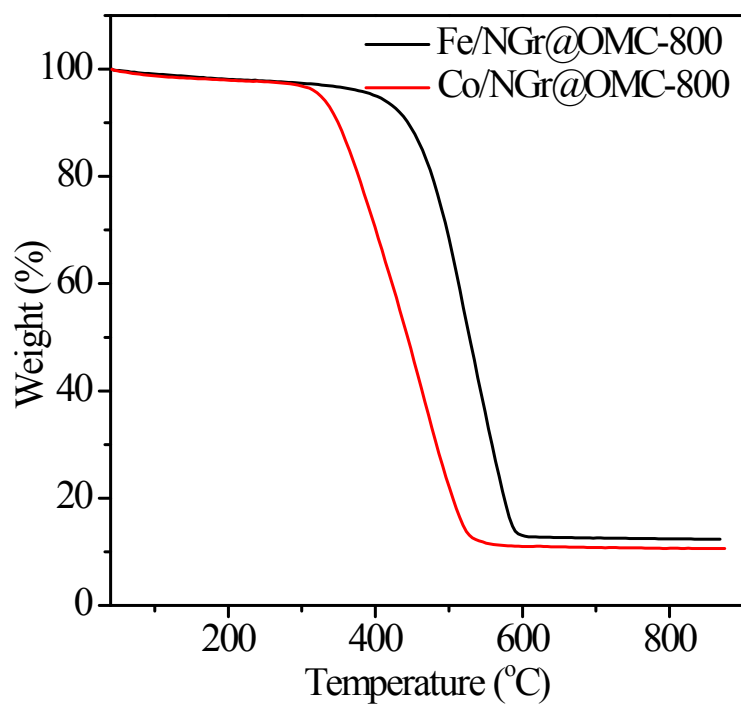

**Fig. S4** TGA curve of the Co/NGr@OMC-800 and Fe/NGr@OMC-800 catalysts.

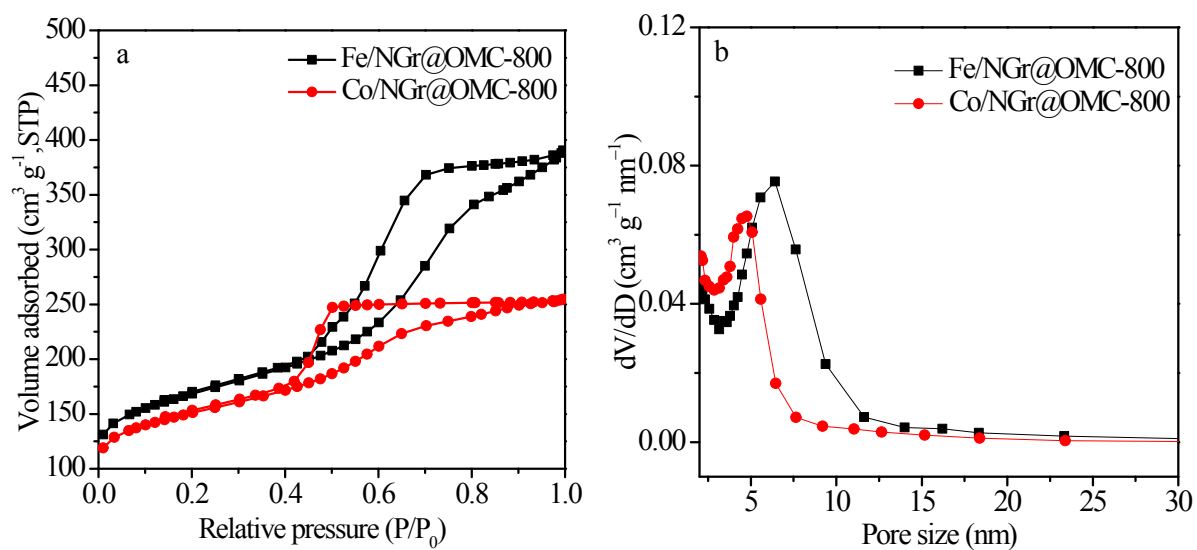

**Fig. S5** (a) N<sub>2</sub> sorption isotherms, and (b) BJH pore size distributions of the Co/NGr@OMC-800 and Fe/NGr@OMC-800 catalysts.

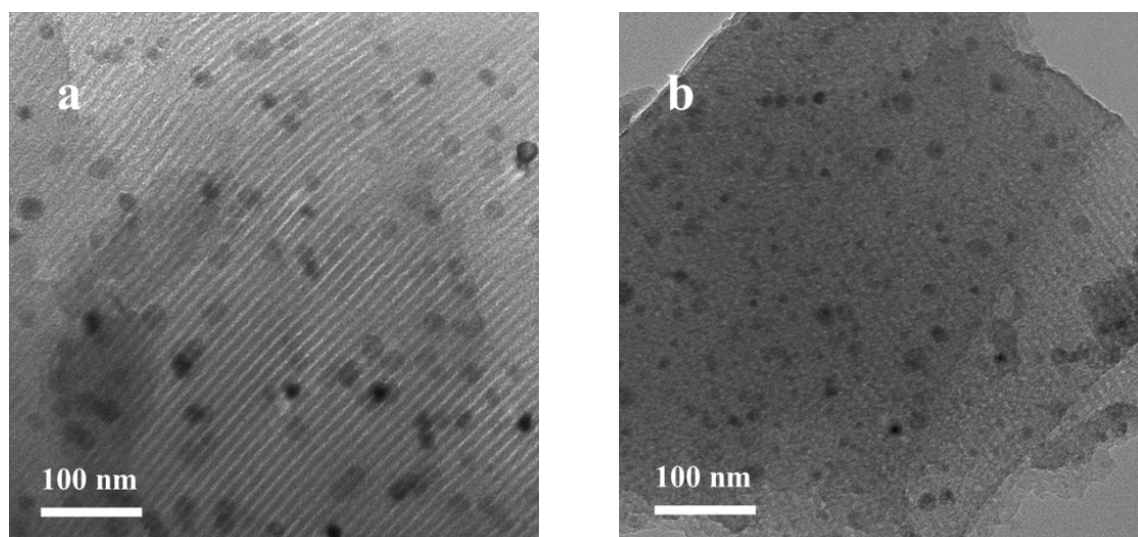

**Fig. S6** TEM images of the (a) Co/NGr@OMC-800, and (b) Fe/NGr@OMC-800 catalysts.

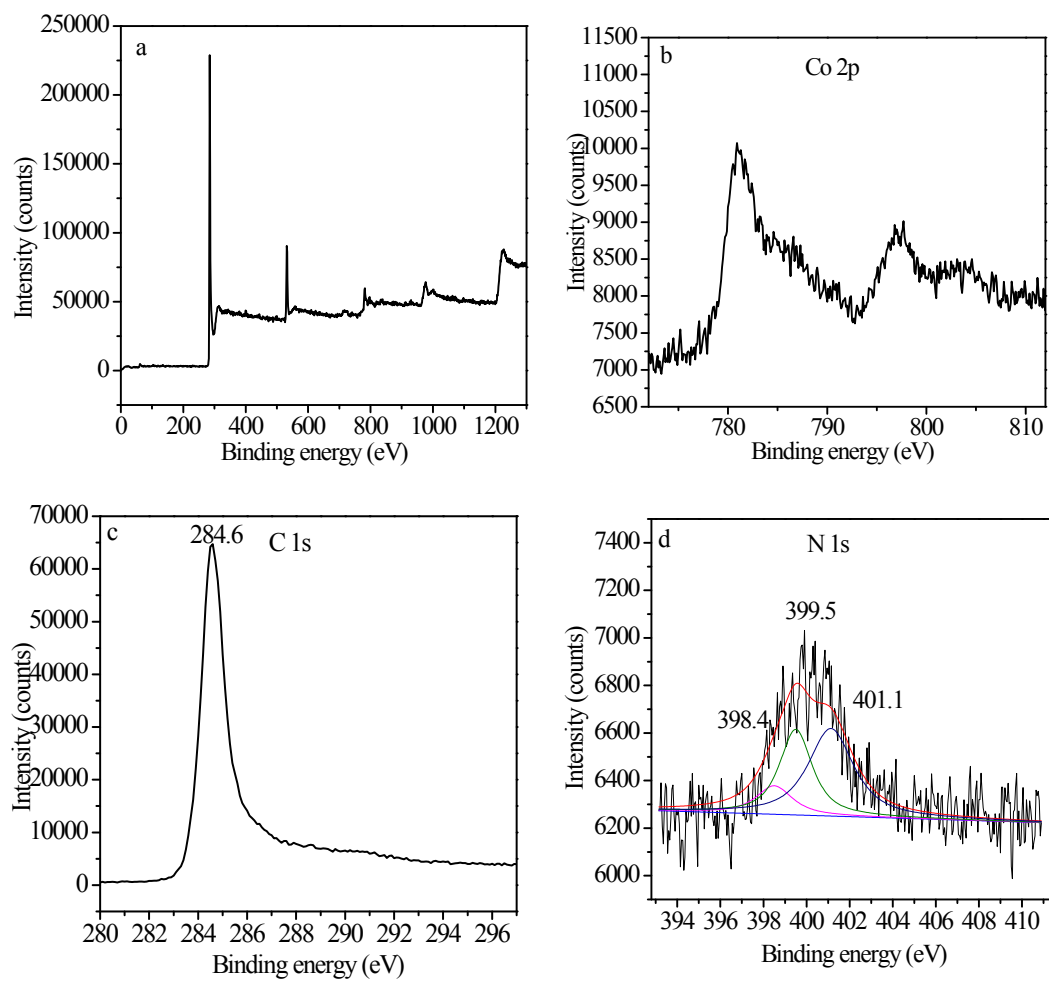

**Fig. S7** XPS spectra of the Co/NGr@OMC-800 catalyst: (a) the survey scan, (b) Co 2p, (c) C 1s, and (d) N 1s.

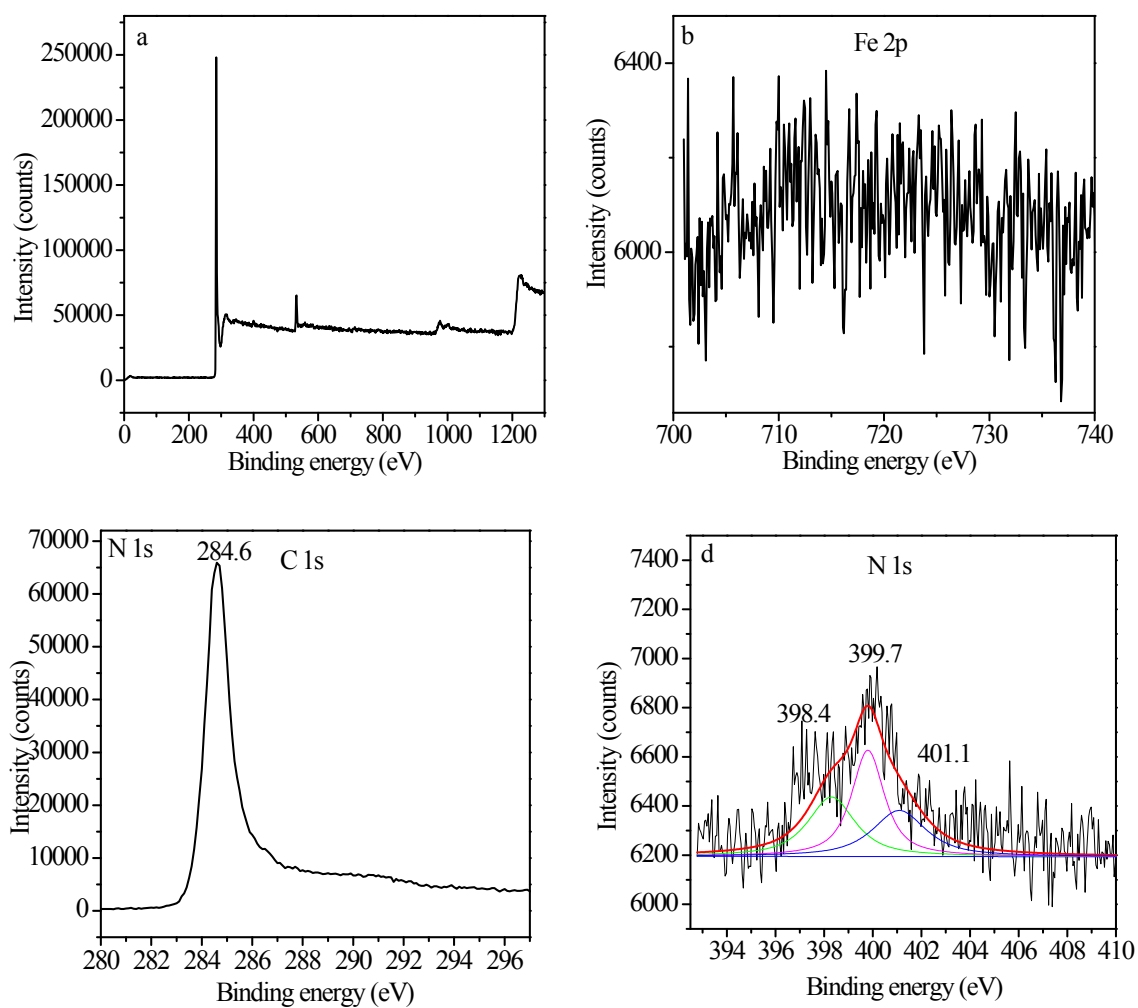

**Fig.S8** XPS spectra of the Fe/NGr@OMC-800 catalyst: (a) the survey scan, (b) Fe 2p, (c) C 1s, and (d) N 1s.
